# Supplementary material for: A bifunctional amino acid to study protein–protein interactions
Source: Royal Society of Chemistry journal article supplement (doi:10.1039/d0ra09110c), 2020-01-01

## Supporting Information

### **A bifunctional amino acid to study protein-protein interactions**

Tangpo Yang,<sup>a,b</sup> Xin Li,<sup>a</sup> and Xiang David Li <sup>\*a</sup>

<sup>a</sup>Departments of Chemistry, The University of Hong Kong, Pokfulam Road, Hong Kong, China

<sup>b</sup>Current address: Department of Cellular and Molecular Pharmacology, University of California, San Francisco, California 94158, United States.

\*To whom correspondence may be addressed.

Email: [xiangli@hku.hk](mailto:xiangli@hku.hk)

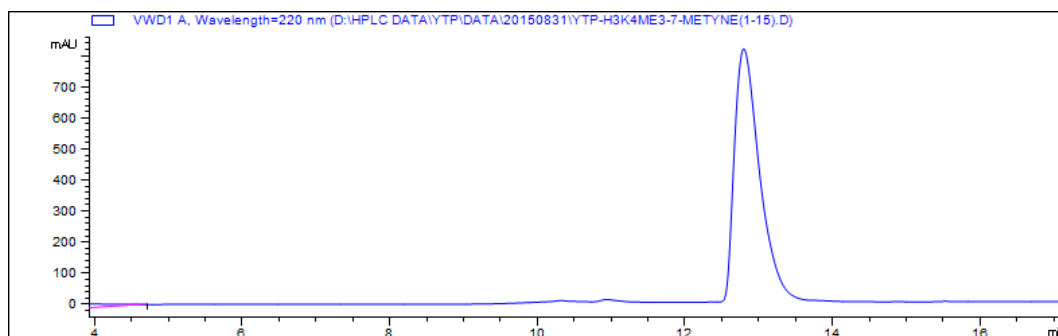

YTP-H3K4me3Metyne(1-15) #858-871 RT: 13.52-13.71 AV: 14 NL: 6.65E7  
 T: + c ESI Full ms [300.00-2000.00]

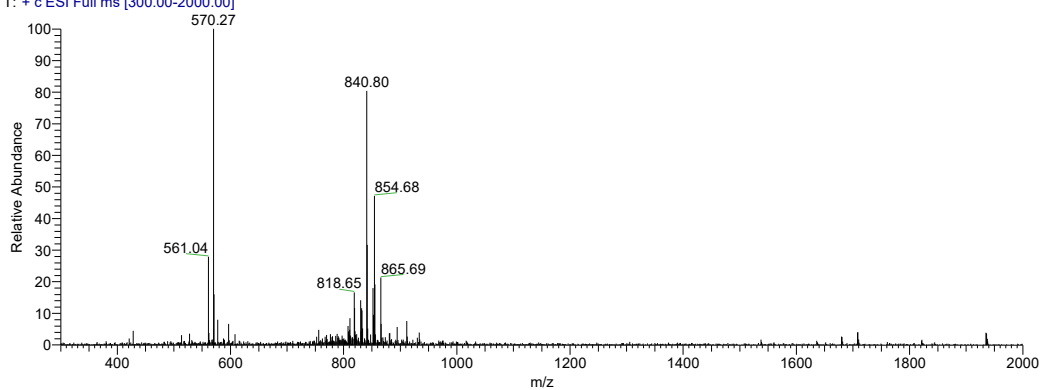

**Fig. S2** LC–MS analysis of **probe 1**.  $m/z$  854.68 ( $M + 2H^+$ ), calculated  $m/z$  854.50 ( $M + 2H^+$ );  $m/z$  840.80 ( $M - N_2 + 2H^+$ ), calculated  $m/z$  840.50 ( $M - N_2 + 2H^+$ );  $m/z$  570.27 ( $M + 3H^+$ ), calculated  $m/z$  570.00 ( $M + 3H^+$ );  $m/z$  561.04 ( $M - N_2 + 3H^+$ ), calculated  $m/z$  560.67 ( $M - N_2 + 3H^+$ ).

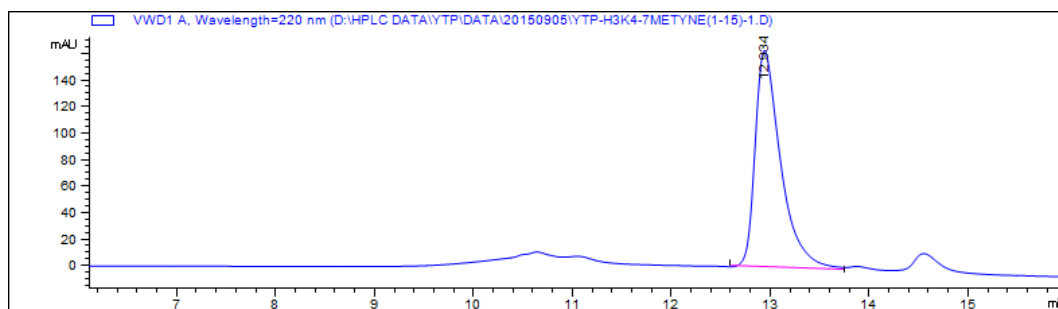

YTP-H3K4Metyne(1-15) #807-812 RT: 13.60-13.67 AV: 6 NL: 2.62E7  
 T: + c ESI Full ms [300.00-2000.00]

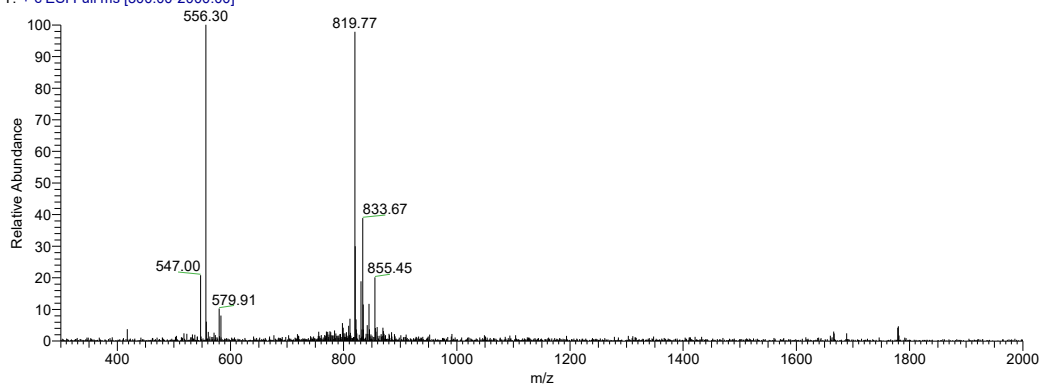

**Fig. S3** LC–MS analysis of **probe 2**.  $m/z$  855.45 ( $M + 2Na^+$ ), calculated  $m/z$  855.48 ( $M + 2Na^+$ );  $m/z$  833.67 ( $M + 2H^+$ ), calculated  $m/z$  833.48 ( $M + 2H^+$ );  $m/z$  819.77 ( $M - N_2 + 2H^+$ ), calculated  $m/z$  819.48 ( $M - N_2 + 2H^+$ );  $m/z$  556.30 ( $M + 3H^+$ ), calculated  $m/z$  555.98 ( $M + 3H^+$ );  $m/z$  547.00 ( $M - N_2 + 3H^+$ ), calculated  $m/z$  546.65 ( $M - N_2 + 3H^+$ ).

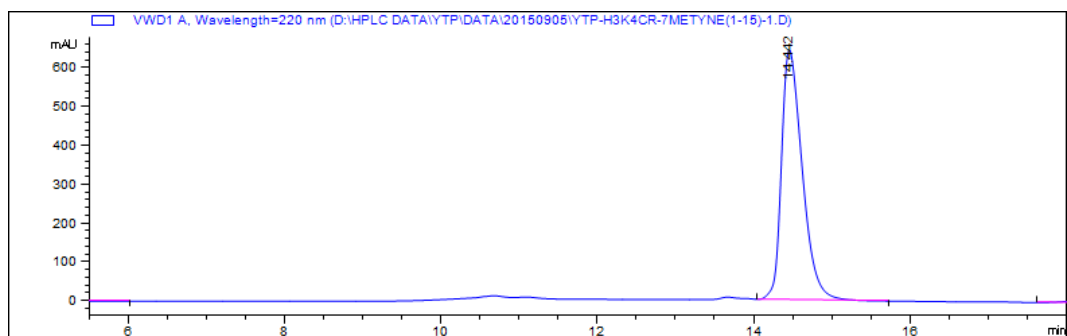

ytp-H3K4Cr-7Metyne(1-15)-1 #902 RT: 14.94 AV: 1 NL: 7.34E7  
 T: + c ESI Full ms [300.00-2000.00]

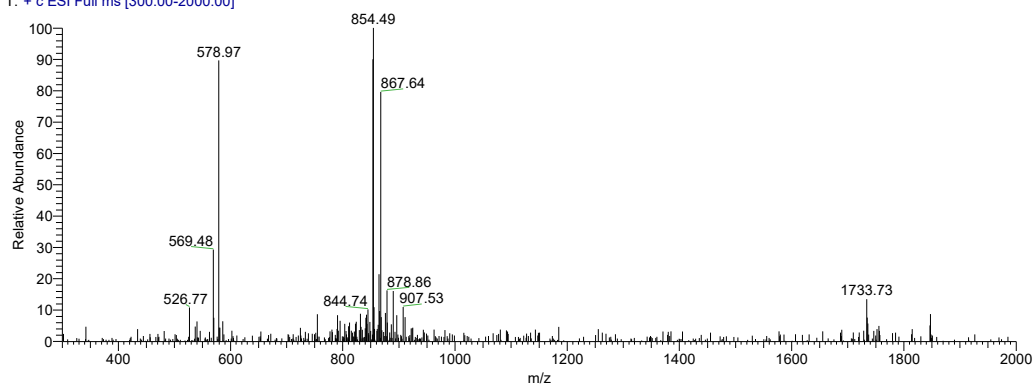

**Fig. S4** LC–MS analysis of **probe 3**.  $m/z$  1733.73 ( $M + 1H^+$ ), calculated  $m/z$  1733.98 ( $M + 1H^+$ );  $m/z$  867.64 ( $M + 2H^+$ ), calculated  $m/z$  867.49 ( $M + 2H^+$ );  $m/z$  854.49 ( $M - N_2 + 2H^+$ ), calculated  $m/z$  853.49 ( $M - N_2 + 2H^+$ );  $m/z$  578.97 ( $M + 3H^+$ ), calculated  $m/z$  578.60 ( $M + 3H^+$ ).

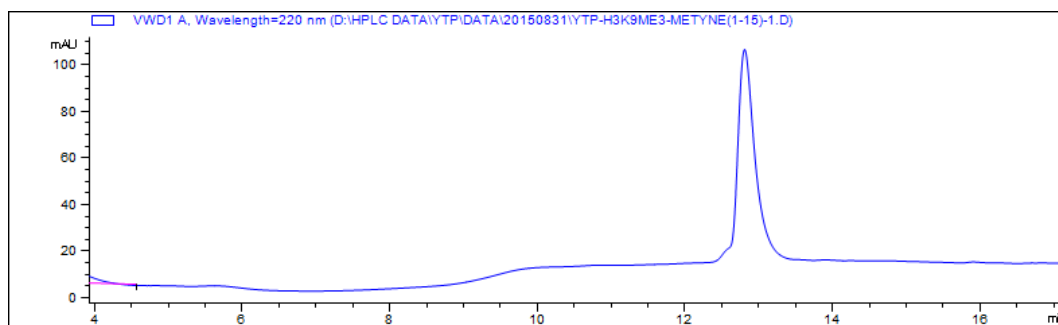

ytp-h3k9me3-Metyne(1-15) #782-796 RT: 13.00-13.21 AV: 15 NL: 3.30E7  
 T: + c ESI Full ms [300.00-2000.00]

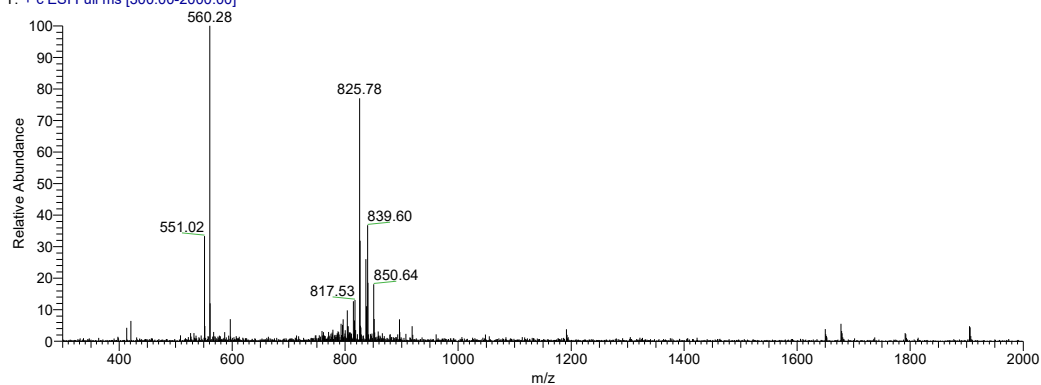

**Fig. S5** LC–MS analysis of **probe 4**.  $m/z$  839.60 ( $M + 2H^+$ ), calculated  $m/z$  839.50 ( $M + 2H^+$ );  $m/z$  825.78 ( $M - N_2 + 2H^+$ ), calculated  $m/z$  825.50 ( $M - N_2 + 2H^+$ );  $m/z$  560.28 ( $M + 3H^+$ ), calculated  $m/z$  560.00 ( $M + 3H^+$ );  $m/z$  551.02 ( $M - N_2 + 3H^+$ ), calculated  $m/z$  550.67 ( $M - N_2 + 3H^+$ ).

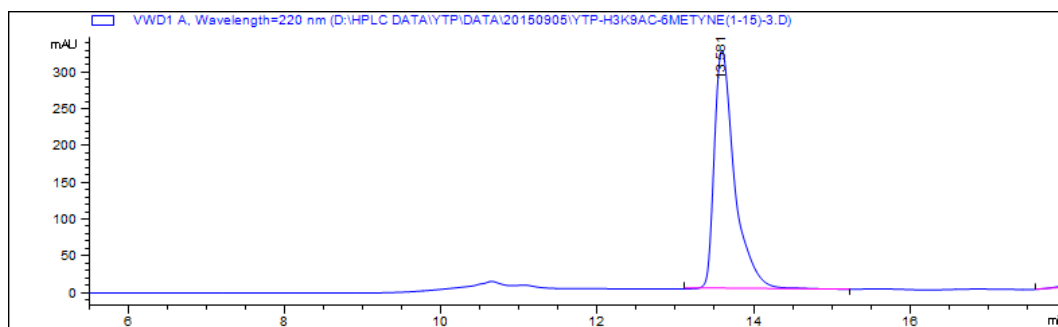

YTP-H3K9ac-Metyne(1-15) #849-862 RT: 14.26-14.46 AV: 14 NL: 3.87E7  
 T: + c ESI Full ms [300.00-2000.00]

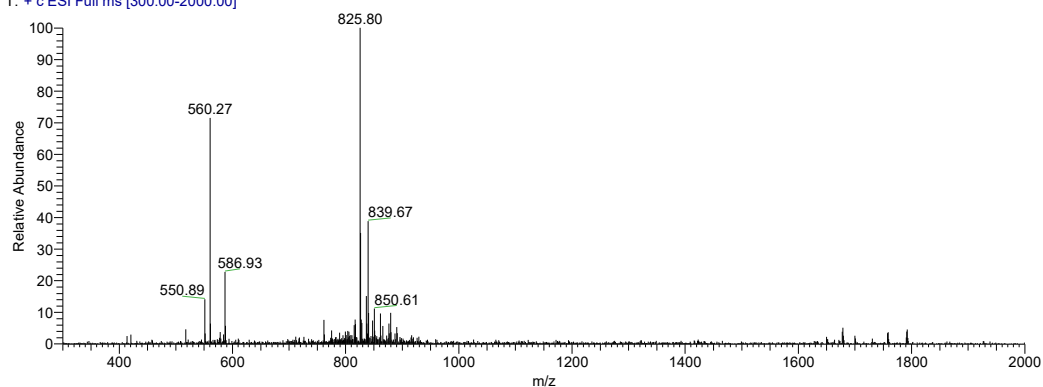

**Fig. S6** LC–MS analysis of **probe 5**.  $m/z$  839.67 ( $M + 2H^+$ ), calculated  $m/z$  839.48 ( $M + 2H^+$ );  $m/z$  825.80 ( $M - N_2 + 2H^+$ ), calculated  $m/z$  825.48 ( $M - N_2 + 2H^+$ );  $m/z$  560.27 ( $M + 3H^+$ ), calculated  $m/z$  559.98 ( $M + 3H^+$ );  $m/z$  550.89 ( $M - N_2 + 3H^+$ ), calculated  $m/z$  550.65 ( $M - N_2 + 3H^+$ ).

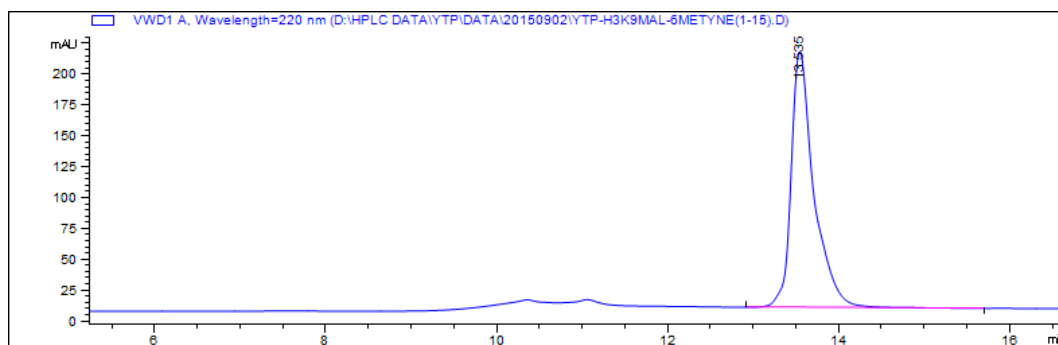

ytp-h3k9mal-6-Metyne(1-15) #841-848 RT: 14.05-14.15 AV: 8 NL: 1.02E8  
T: + c ESI Full ms [300.00-2000.00]

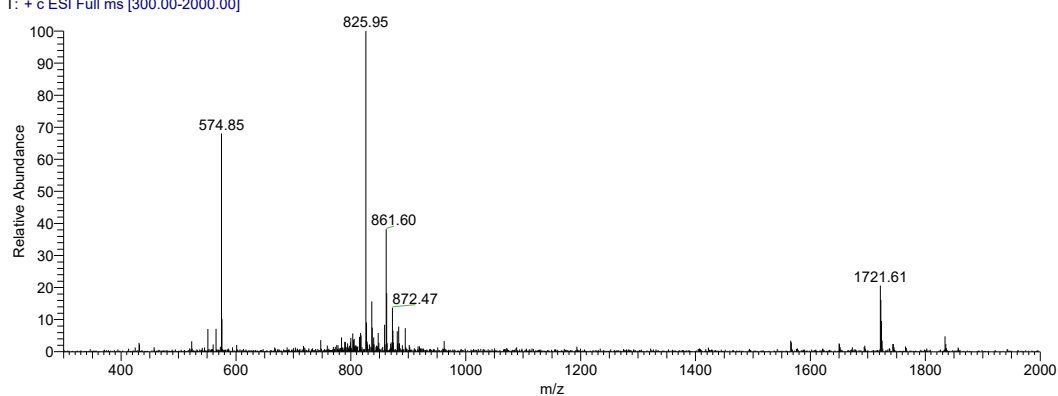

**Fig. S7** LC–MS analysis of **probe 6**.  $m/z$  1721.61 ( $M + 1H^+$ ), calculated  $m/z$  1721.94 ( $M + 1H^+$ );  $m/z$  861.60 ( $M + 2H^+$ ), calculated  $m/z$  861.47 ( $M + 2H^+$ );  $m/z$  825.95 ( $M - N_2 - CO_2 + 2H^+$ ), calculated  $m/z$  825.47 ( $M - N_2 - CO_2 + 2H^+$ );  $m/z$  574.85 ( $M + 3H^+$ ), calculated  $m/z$  574.65 ( $M + 3H^+$ ).

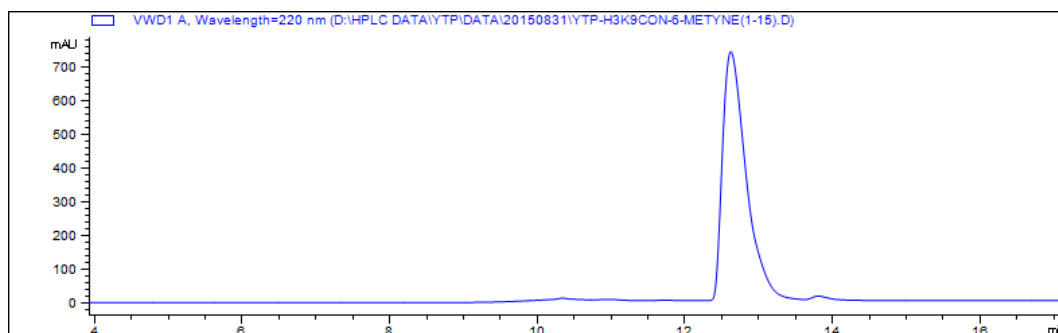

H3K9Metyne(1-15) #108-111 RT: 2.57-2.63 AV: 4 NL: 3.69E8  
T: + c ESI Full ms [300.00-2000.00]

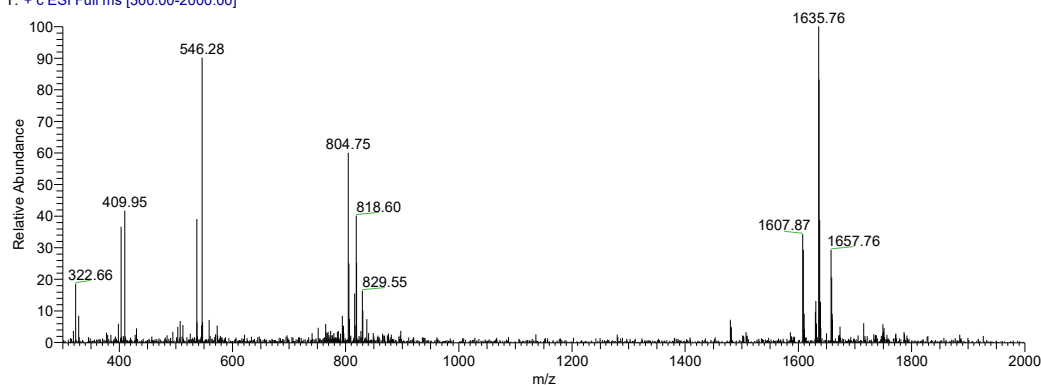

**Fig. S8** LC–MS analysis of **probe 7**.  $m/z$  1657.76 ( $M + Na^+$ ), calculated  $m/z$  1657.94 ( $M + Na^+$ );  $m/z$  1635.76 ( $M + 1H^+$ ), calculated  $m/z$  1635.94 ( $M + 1H^+$ );  $m/z$  1607.87 ( $M - N_2 + 1H^+$ ), calculated  $m/z$  1607.94 ( $M - N_2 + 1H^+$ );  $m/z$  818.60 ( $M + 2H^+$ ), calculated  $m/z$  818.47 ( $M + 2H^+$ );  $m/z$  804.75 ( $M - N_2 + 2H^+$ ), calculated  $m/z$  804.47 ( $M - N_2 + 2H^+$ );  $m/z$  546.28 ( $M + 3H^+$ ), calculated  $m/z$  545.98 ( $M + 3H^+$ );  $m/z$  409.95 ( $M + 4H^+$ ), calculated  $m/z$  409.74 ( $M + 4H^+$ ).

The synthesis of H3K4me0 and H3K4me3 peptides have been reported previously.<sup>2</sup>



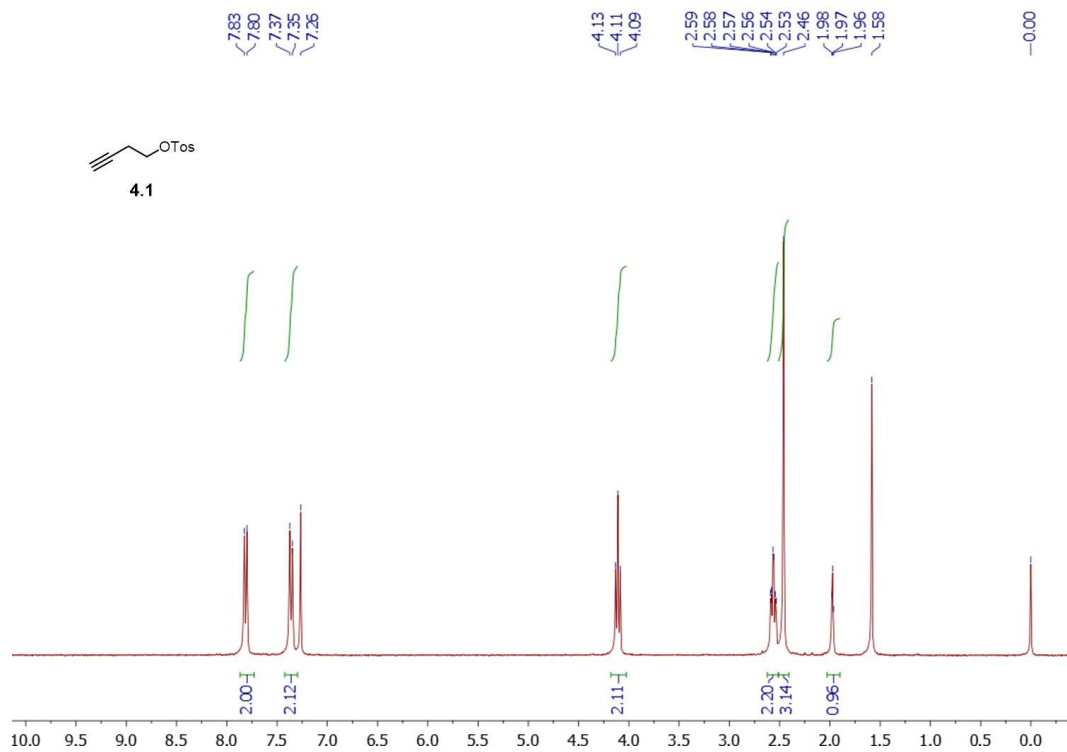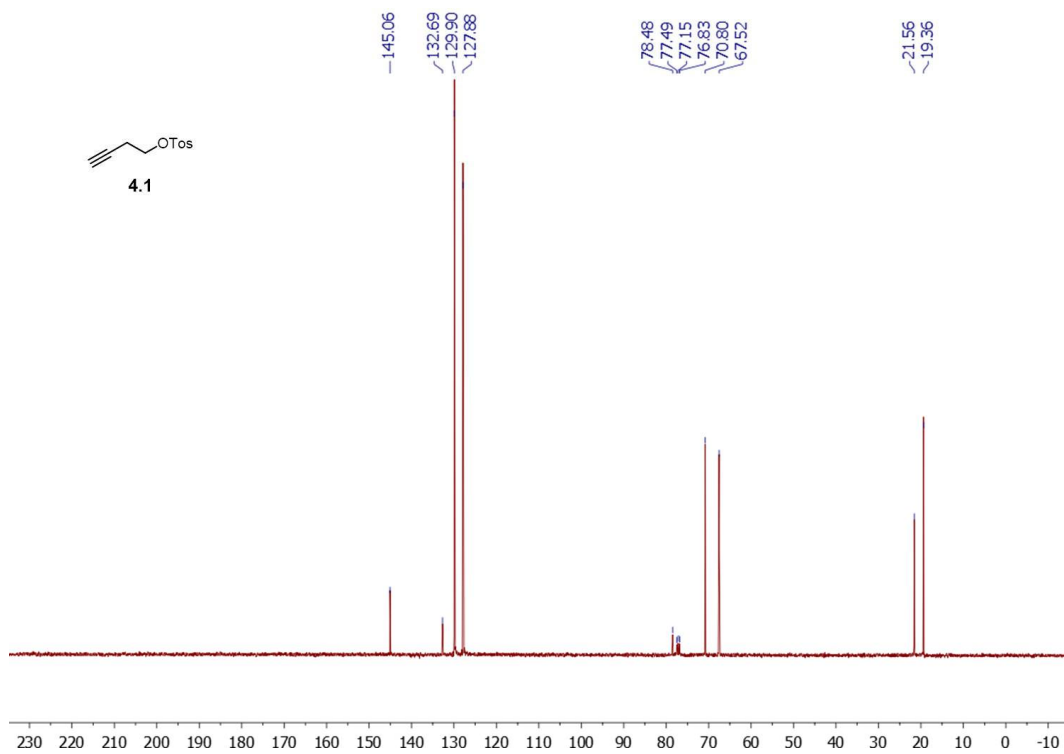

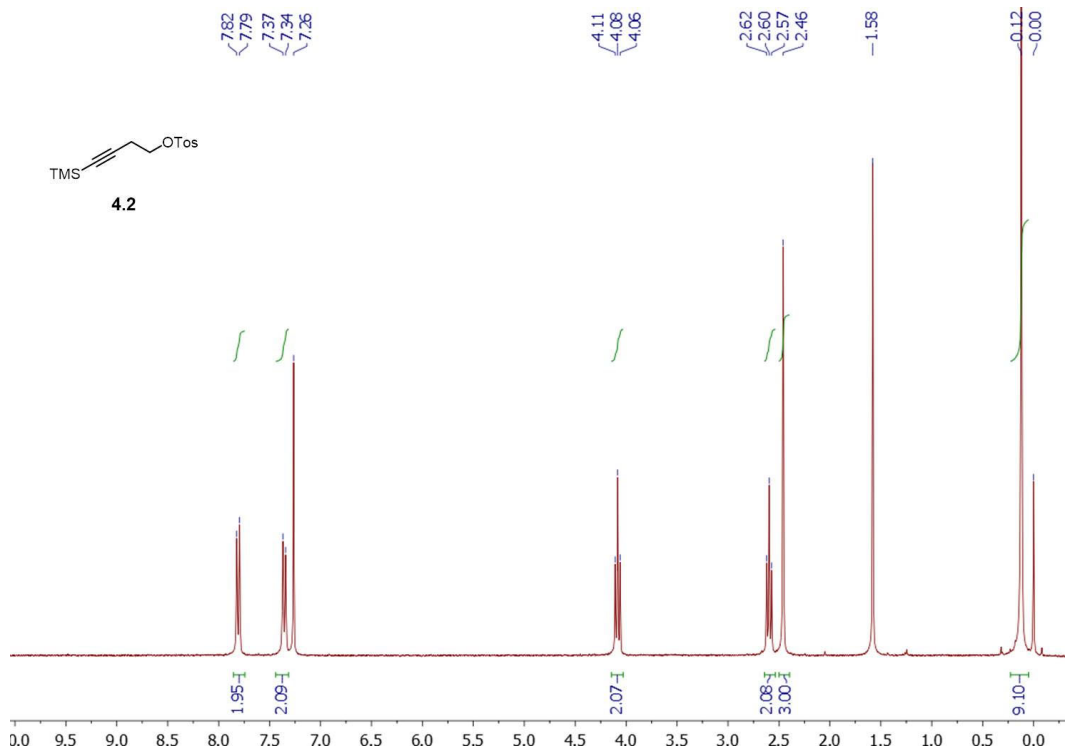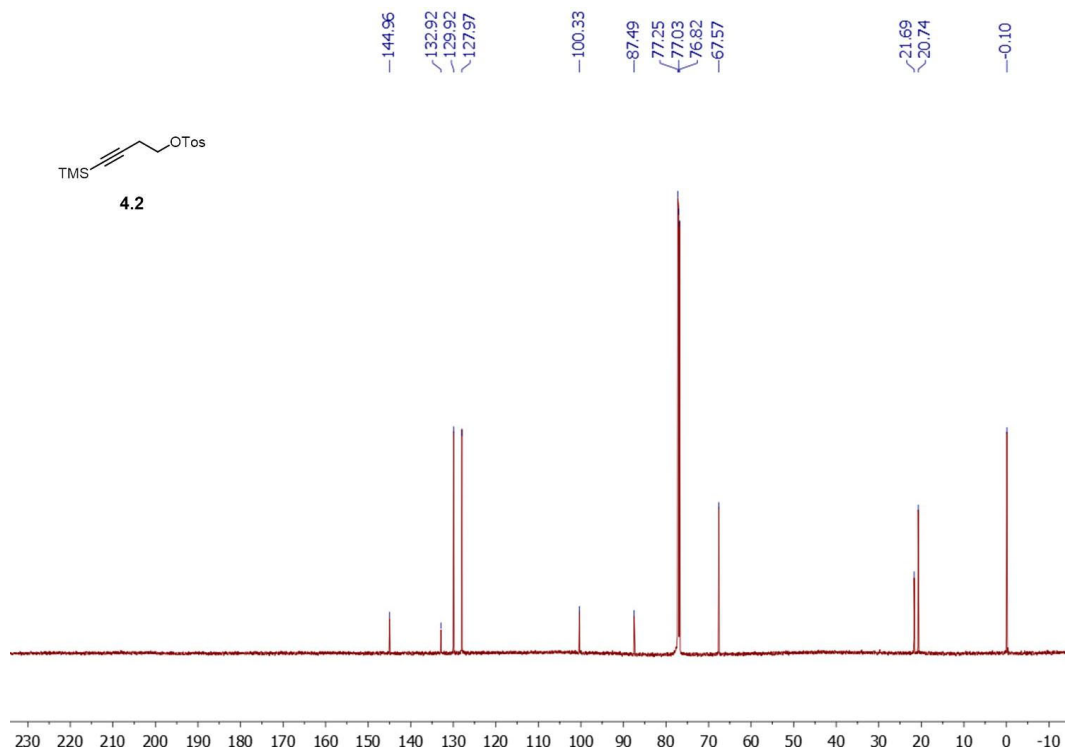

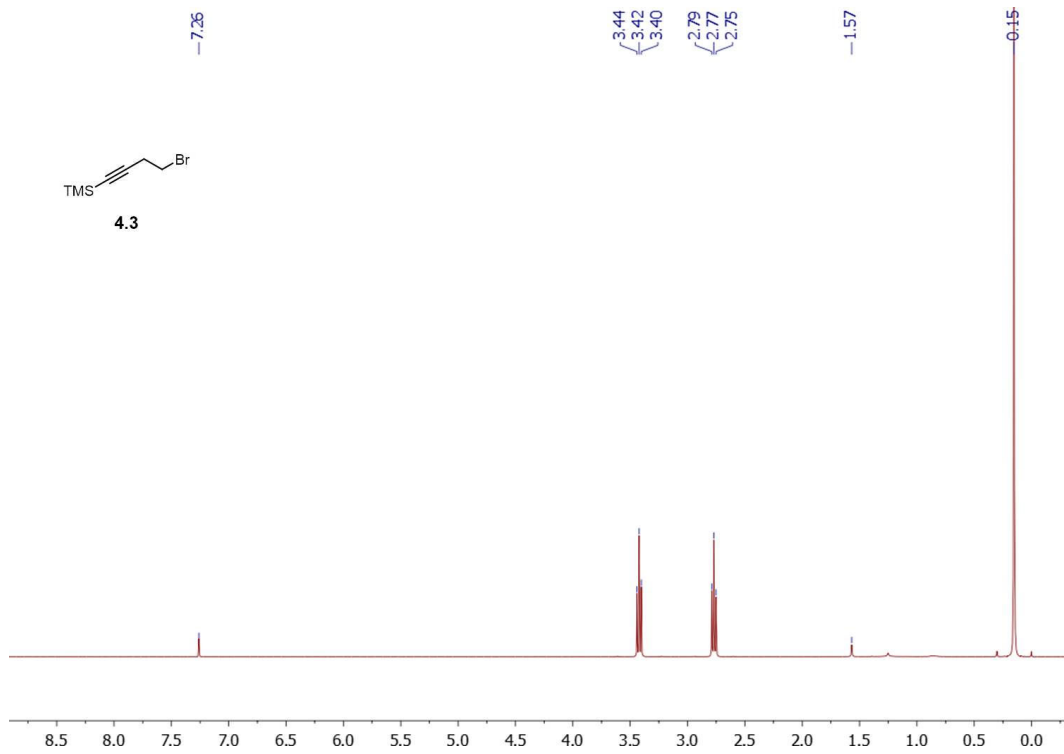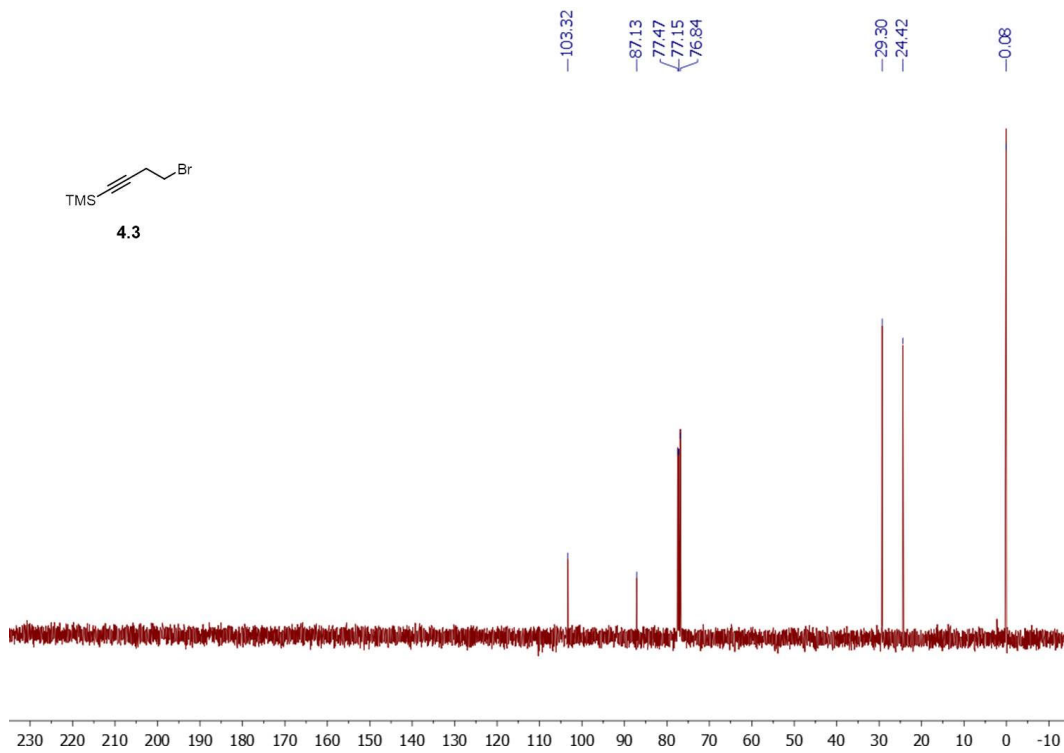

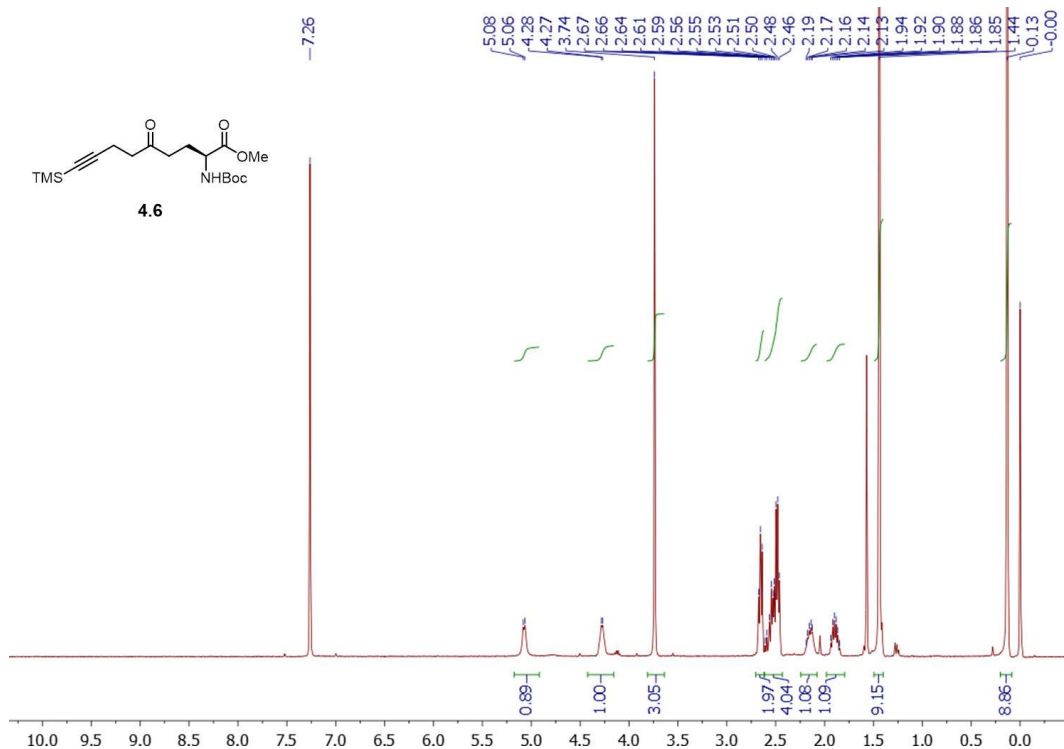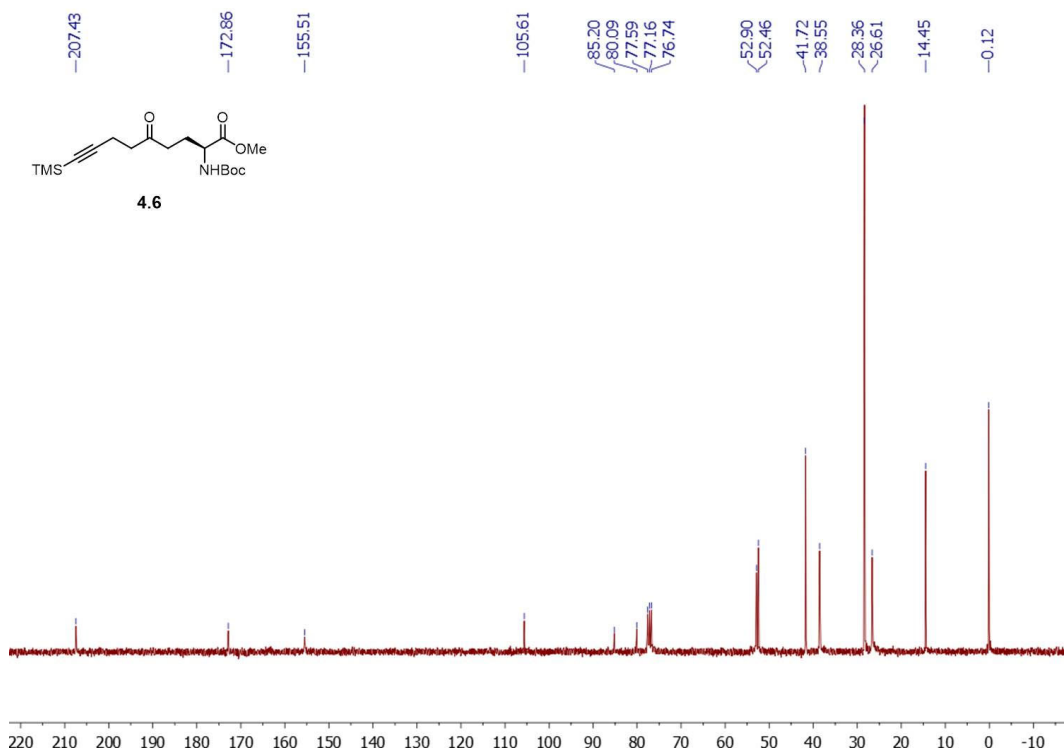



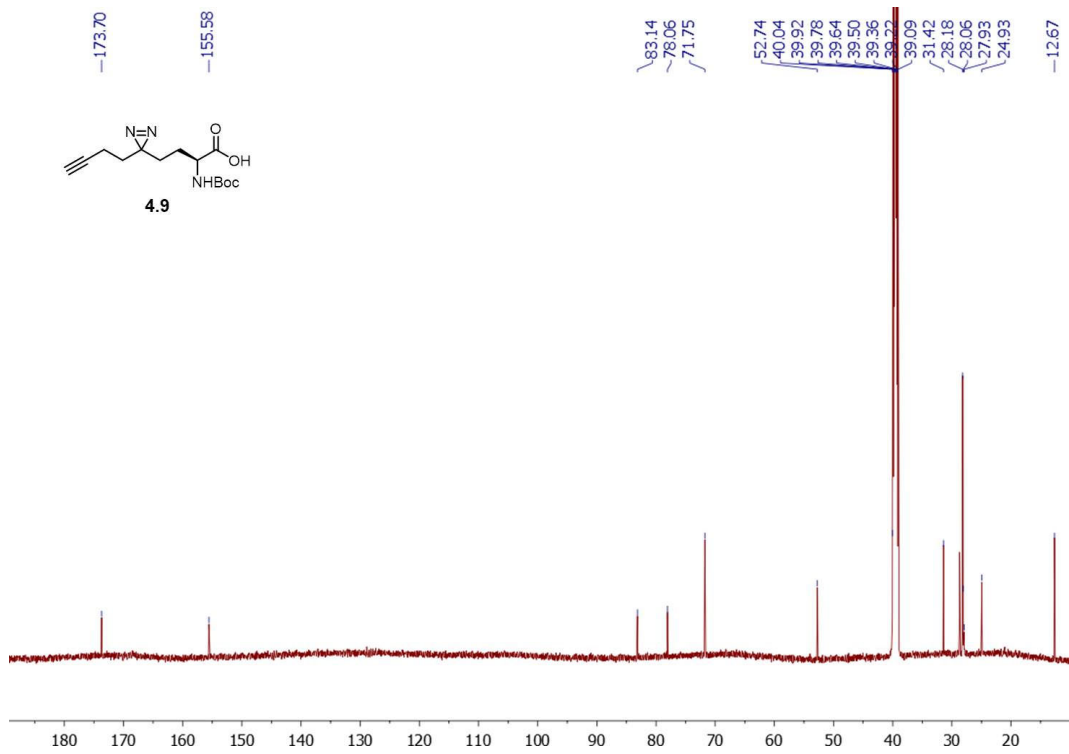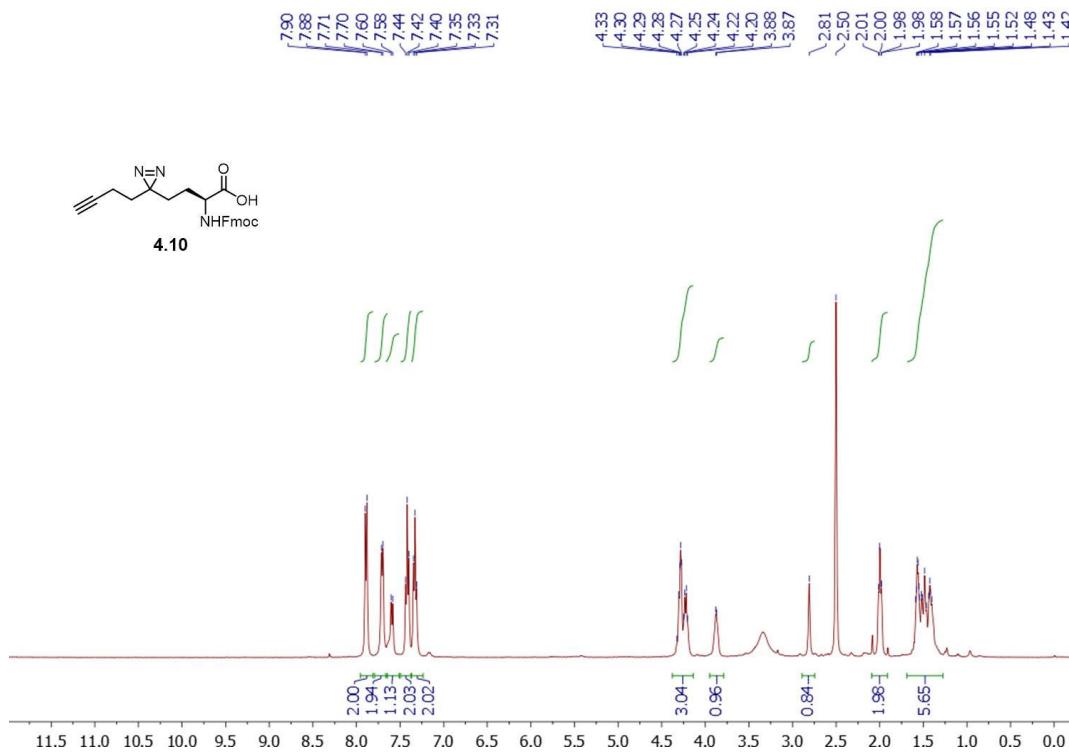

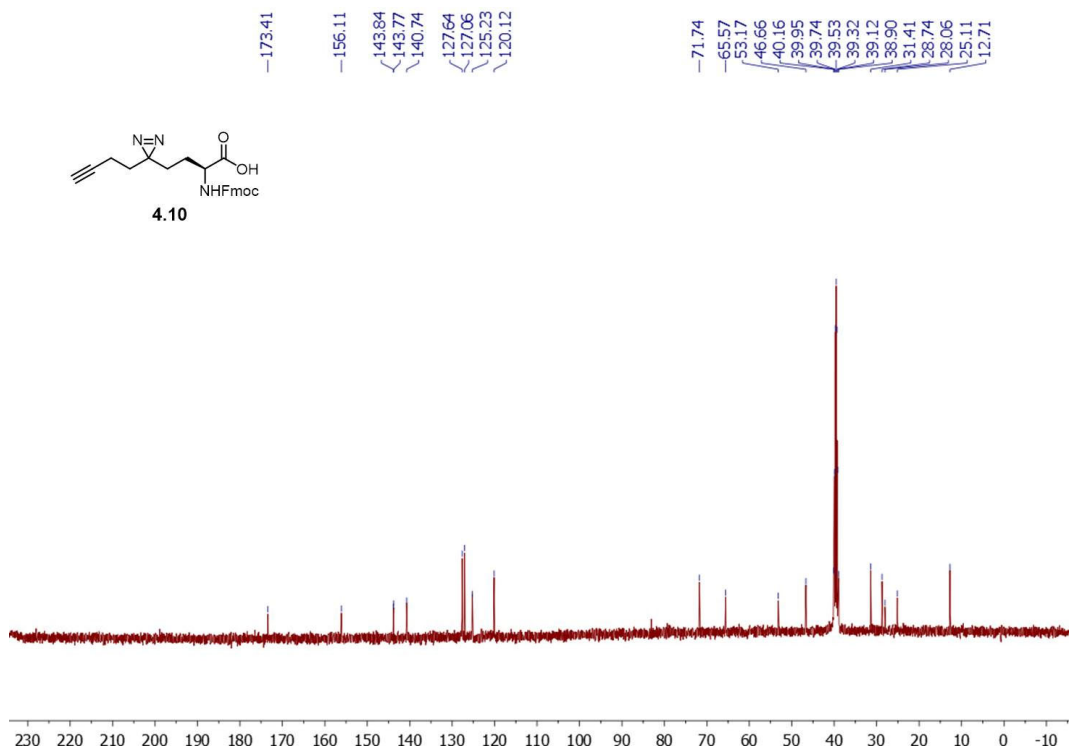

Supplement: d0ra09110c1.pdf [file d0ra09110c1.pdf]
